# Supplementary material for: Human Papillomavirus Oral- and Sero- Positivity in Fanconi Anemia
Source: MDPI journal article supplement (doi:10.3390/cancers13061368), 2021-03-18
Supplement: s1 [file s1]

# Supplementary Materials: Human Papillomavirus Oral- and Sero- Positivity in Fanconi Anemia

Sharon L. Sauter, Xue Zhang, Lindsey Romick-Rosendale, Susanne I. Wells, Kasiani C. Myers, Marion G. Brusadelli, Charles B. Poff, Darron R. Brown, Gitika Panicker, Elizabeth R. Unger, Parinda A. Mehta, Jack Bleesing, Stella M. Davies and Melinda Butsch Kovacic

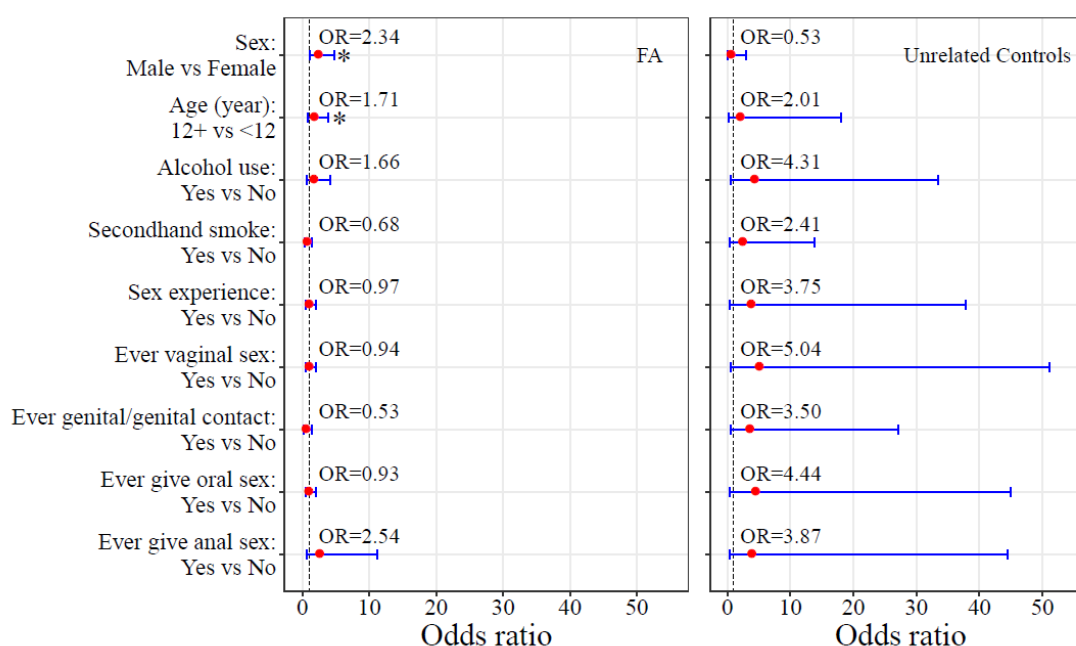

**Figure S1.** Odds of Oral HPV Detection. Included were 201 individuals with Fanconi anemia (FA; 41 oral HPV positive) compared to 107 unrelated controls (6 oral HPV positive).

**Table S1.** Group Comparisons of Sexual Behavior.

| All participants                           | FA<br>(N=212) | Siblings<br>(N=98) | <sup>a</sup> p-value | Parents<br>(N=232) | <sup>b</sup> p-value | Unrelated<br>(N=110) | <sup>c</sup> p-value | <sup>d</sup> All Control<br>p-value |
|--------------------------------------------|---------------|--------------------|----------------------|--------------------|----------------------|----------------------|----------------------|-------------------------------------|
| <sup>e</sup> Kissing History               |               |                    | 0.23                 |                    | <0.001               |                      | 0.13                 | 0.07                                |
| No                                         | 123 (62%)     | 60 (70%)           |                      | 8 (4%)             |                      | 39 (52%)             |                      |                                     |
| Yes                                        | 75 (38%)      | 26 (30%)           |                      | 200 (96%)          |                      | 36 (48%)             |                      |                                     |
| Among Those With<br>Prior Sexual Histories | FA<br>(N=71)  | Siblings<br>(N=19) | <sup>a</sup> p-value | Parents<br>(N=232) | <sup>b</sup> p-value | Unrelated<br>(N=33)  | <sup>c</sup> p-value | <sup>d</sup> All Control<br>p-value |
| Ever had Vaginal Sex                       |               |                    | 0.11                 |                    | <b>0.014</b>         |                      | 0.65                 | <b>&lt;0.001</b>                    |
| No                                         | 3 (4%)        | 3 (16%)            |                      | 0 (0%)             |                      | 2 (6%)               |                      |                                     |
| Yes                                        | 68 (96%)      | 16 (84%)           |                      | 218 (100%)         |                      | 31 (94%)             |                      |                                     |
| Genital to Genital Contact                 |               |                    | 0.74                 |                    | 0.75                 |                      | 0.63                 | 0.80                                |
| No                                         | 19 (33%)      | 3 (23%)            |                      | 58 (36%)           |                      | 10 (38%)             |                      |                                     |
| Yes                                        | 39 (67%)      | 10 (77%)           |                      | 104 (64%)          |                      | 16 (62%)             |                      |                                     |
| Finger to Genital Contact                  |               |                    | 1.00                 |                    | 0.79                 |                      | 1.00                 | 0.81                                |
| No                                         | 4 (7%)        | 0 (0%)             |                      | 14 (9%)            |                      | 1 (4%)               |                      |                                     |
| Yes                                        | 55 (93%)      | 13 (100%)          |                      | 149 (91%)          |                      | 25 (96%)             |                      |                                     |
| Ever Give Oral Sex                         |               |                    | 0.70                 |                    | 0.47                 |                      | 0.27                 | 0.33                                |
| No                                         | 8 (11%)       | 3 (16%)            |                      | 18 (8%)            |                      | 1 (3%)               |                      |                                     |
| Yes                                        | 62 (89%)      | 16 (84%)           |                      | 197 (92%)          |                      | 32 (97%)             |                      |                                     |
| Ever Receive Oral Sex                      |               |                    | 0.19                 |                    | 0.32                 |                      | 0.27                 | 0.33                                |
| No                                         | 8 (11%)       | 0 (0%)             |                      | 16 (7%)            |                      | 1 (3%)               |                      |                                     |
| Yes                                        | 62 (89%)      | 19 (100%)          |                      | 199 (93%)          |                      | 32 (97%)             |                      |                                     |
| Ever Give Anal Sex                         |               |                    | 0.68                 |                    | 1.00                 |                      | 0.34                 | 0.49                                |
| No                                         | 55 (87%)      | 11 (85%)           |                      | 153 (87%)          |                      | 20 (77%)             |                      |                                     |
| Yes                                        | 8 (13%)       | 2 (15%)            |                      | 22 (13%)           |                      | 6 (23%)              |                      |                                     |
| Ever Receive Anal Sex                      |               |                    | 0.17                 |                    | 0.73                 |                      | 1.00                 | 0.49                                |
| No                                         | 51 (76%)      | 15 (94%)           |                      | 150 (79%)          |                      | 20 (77%)             |                      |                                     |
| Yes                                        | 16 (24%)      | 1 (6%)             |                      | 41 (21%)           |                      | 6 (23%)              |                      |                                     |

Note: Data are shown as frequency (%) and compared using Fisher's exact tests. a: comparing FA with siblings; b: comparing FA with parents; c: comparing FA with unrelated controls; d: comparing FA to all control groups; e: parents were excluded from the all group comparison. Those with missing responses were not included in individual analyses. Bold indicates significant differences at the 0.05 level.

**Table S2.** HPV Serotiters of Bone Marrow Transplant Negative Participants with FA Compared to Unrelated Controls.

| HPV type      | Unvaccinated          |                     |         | Vaccinated             |                       |         |
|---------------|-----------------------|---------------------|---------|------------------------|-----------------------|---------|
|               | HSCT (-) FA<br>(n=29) | Unrelated<br>(n=32) | p-value | HSCT (-) FA<br>(n=23)  | Unrelated<br>(n=21)   | p-value |
| HPV6 (AU/ml)  | 0.76 (0.38, 1.50)     | 0.40 (0.19, 0.86)   | 0.21    | 29.27 (8.18, 104.70)   | 43.16 (12.59, 147.90) | 0.65    |
| HPV11 (AU/ml) | 0.42 (0.22, 0.79)     | 0.37 (0.17, 0.81)   | 0.78    | 41.96 (11.53, 152.70)  | 65.32 (18.17, 234.80) | 0.61    |
| HPV16 (IU/ml) | 1.29 (0.64, 2.60)     | 0.84 (0.38, 1.88)   | 0.41    | 117.60 (38.26, 361.20) | 120.8 (33.87, 431.10) | 0.97    |
| HPV18 (IU/ml) | 1.07 (0.65, 1.77)     | 0.86 (0.42, 1.75)   | 0.60    | 44.05 (15.56, 124.70)  | 35.48 (11.68, 107.70) | 0.77    |
| HPV31 (AU/ml) | 1.75 (0.98, 3.13)     | 1.27 (0.73, 2.22)   | 0.42    | 9.55 (4.63, 19.71)     | 12.22 (4.92, 30.37)   | 0.66    |
| HPV33 (AU/ml) | 1.78 (0.99, 3.22)     | 1.57 (0.92, 2.67)   | 0.74    | 5.79 (2.73, 12.28)     | 7.60 (3.20, 18.04)    | 0.62    |
| HPV45 (AU/ml) | 3.37 (1.65, 6.87)     | 2.11 (1.33, 3.33)   | 0.26    | 10.48 (4.96, 22.16)    | 12.69 (5.97, 26.98)   | 0.71    |
| HPV52 (AU/ml) | 1.00 (0.61, 1.63)     | 1.07 (0.63, 1.82)   | 0.84    | 3.32 (1.54, 7.13)      | 5.07 (2.14, 12.00)    | 0.45    |
| HPV58 (AU/ml) | 3.49 (1.73, 7.03)     | 2.17 (1.27, 3.71)   | 0.27    | 9.29 (4.16, 20.75)     | 12.08 (5.49, 26.56)   | 0.63    |

Note: Data are shown as geometric mean (95% CL) and compared using t-tests. ELISA, titers based on either a 4-plex or 9-plex HPV VLP IgG enzyme-linked immunosorbent assay. Titers under detection limits were imputed as half of the detection limits. One subject who received Cervarix (bivalent) vaccine was considered unvaccinated to HPV6 and HPV11. One subject who received the Gardasil 9 vaccine was excluded from the analysis on HPV31, 33, 45, 52 and 58. HSCT (-) indicates subjects who had not reported a history of a hematopoietic stem cell transplant. IU/ml – International units per milliliter; AU/ml – Arbitrary units per milliliter.

**Table 3.** HPV Titers for Unvaccinated Children ≤13 Years Old Without Reported Sexual Experience.

| Group                                         | Characteristics |      | M4/M9 ELISA (IU/ml) |       |      |       | M4/M9 ELISA (AU/ml) |       |       |       |          | Ever Oral HPV+ |
|-----------------------------------------------|-----------------|------|---------------------|-------|------|-------|---------------------|-------|-------|-------|----------|----------------|
|                                               |                 |      | HPV16               | HPV18 | HPV6 | HPV11 | HPV31               | HPV33 | HPV45 | HPV52 | HPV58    |                |
| FA<br>(n=30; 65% of those age <=13yrs)        | 2               | No   | 1.8                 | 2.3   | 0.5  | 0.5   | 5.3                 | 4.3   | 8.2   | 2.4   | 9.6      | HPV16          |
|                                               | 5               | No   | 1.0                 | 1.3   | 0.4  | 0.5   | 2.4                 | 2.7   | 3.6   | 1.8   | 3.9      | Neg            |
|                                               | 5               | No   | 0.6                 | 1.3   | 0.4  | 0.3   | 2.3                 | 2.6   | 4.7   | 1.7   | 3.6      | Neg            |
|                                               | 5               | No   | 0.4                 | 0.8   | 0.3  | 0.3   | 1.16                | 1.49  | 1.38  | Neg   | 1.56     | HPV84          |
|                                               | 6               | No   | 7.6                 | 3.4   | 3.3  | 3.4   | 3.2                 | 3.4   | 4.8   | 1.5   | 4.9      | Neg            |
|                                               | 6               | No   | 2.6                 | 3.6   | 0.3  | 0.2   | 6.5                 | 4.3   | 17.6  | 2.0   | 13.6     | HPV16          |
|                                               | 6               | No   | 4.1                 | 8.9   | 2.8  | 4.9   | 16.8                | 23.9  | 17.2  | 10.0  | 13.7     | Neg            |
|                                               | 6               | No   | 7.4                 | 2.2   | 6.0  | 6.4   | 3.2                 | 1.7   | 3.4   | 0.8   | 3.5      | Neg            |
|                                               | 6               | Yes  | 1.0                 | 1.2   | 0.3  | 0.3   | 2.3                 | 2.1   | 4.4   | 2.3   | 4.4      | Neg            |
|                                               | 6               | Yes  | 1.4                 | 2.2   | 0.6  | 0.5   | 3.8                 | 3.8   | 8.8   | 2.3   | 7.1      | Neg            |
|                                               | 7               | No   | 2.2                 | 1.6   | 0.9  | 0.6   | 2.1                 | 1.6   | 2.7   | 0.8   | 3.0      | Neg            |
|                                               | 7               | Yes  | 0.57                | 0.51  | 1.25 | 1.18  | N/A                 | N/A   | N/A   | N/A   | N/A      | HPV66          |
|                                               | 8               | Yes  | 4.8                 | 2.2   | 2.0  | 1.6   | 2.1                 | 2.1   | 3.2   | 1.3   | 4.0      | Neg            |
|                                               | 8               | No   | 2.0                 | 1.8   | 0.5  | 0.2   | N/A                 | N/A   | N/A   | N/A   | N/A      | Neg            |
|                                               | 8               | No   | 1.11                | 1.38  | 0.38 | 0.46  | N/A                 | N/A   | N/A   | N/A   | N/A      | Neg            |
|                                               | 8               | No   | 2.0                 | 3.1   | 0.8  | 0.8   | 6.1                 | 4.8   | 12.2  | 2.5   | 10.3     | Neg            |
|                                               | 8               | No   | 0.7                 | 1.2   | 0.4  | 0.5   | 2.2                 | 2.6   | 2.5   | 1.2   | 2.7      | Neg            |
|                                               | 9               | Yes  | 0.6                 | 1.1   | 0.7  | 0.4   | 2.4                 | 2.4   | 4.0   | 1.1   | 4.1      | Neg            |
|                                               | 9               | No   | 4.6                 | 4.7   | 0.8  | 0.6   | 9.6                 | 7.3   | 20.7  | 4.6   | 22.7     | Neg            |
|                                               | 9               | No   | 3.9                 | 4.5   | 1.1  | 1.2   | N/A                 | N/A   | N/A   | N/A   | N/A      | HPV16          |
| 9                                             | Yes             | 15.5 | 19.5                | 4.7   | 1.6  | N/A   | N/A                 | N/A   | N/A   | N/A   | HPV6, 16 |                |
| 9                                             | No              | 57.5 | 20.6                | 9.5   | 10.6 | 8.0   | 8.4                 | 15.1  | 4.6   | 10.9  | Neg      |                |
| 10                                            | Yes             | Neg  | Neg                 | 1.1   | 0.2  | Neg   | Neg                 | Neg   | Neg   | Neg   | Neg      |                |
| 10                                            | Yes             | 1.6  | 1.8                 | 0.8   | 1.2  | N/A   | N/A                 | N/A   | N/A   | N/A   | Neg      |                |
| 10                                            | Yes             | 2.3  | 3.5                 | 0.6   | 0.4  | 6.4   | 4.8                 | 11.7  | 3.1   | 14.1  | Neg      |                |
| 11                                            | Yes             | 0.4  | 1.0                 | 0.3   | 0.3  | 2.0   | 2.0                 | 3.4   | 1.1   | 3.3   | Neg      |                |
| 12                                            | No              | 2.9  | 3.5                 | 0.5   | 0.4  | 6.3   | 6.0                 | 16.3  | 2.9   | 14.8  | Neg      |                |
| 13                                            | Yes             | 0.9  | 1.6                 | 0.4   | 0.4  | 2.5   | 3.4                 | 4.6   | 2.0   | 4.9   | Neg      |                |
| 13                                            | No              | 0.3  | 0.6                 | 0.3   | 0.3  | 1.3   | 1.4                 | 1.8   | -     | 1.5   | Neg      |                |
| 13                                            | No              | 21.5 | 4.4                 | 7.7   | 34.0 | N/A   | N/A                 | N/A   | N/A   | N/A   | HPV6, 16 |                |
| Unrelated<br>(n=11; 58% of those age <=13yrs) | 4               | N/A  | 2.6                 | 3.5   | 0.4  | 0.4   | 6.7                 | 4.7   | 8.9   | 2.9   | 16.2     | Neg            |
|                                               | 6               | N/A  | 2.7                 | 3.1   | 0.7  | 0.7   | 6.3                 | 6.6   | 12.2  | 4.2   | 14.6     | Neg            |
|                                               | 6               | N/A  | 1.1                 | 0.8   | 0.3  | 0.4   | 2.0                 | 2.6   | 4.1   | 1.4   | 4.3      | Neg            |
|                                               | 7               | N/A  | 0.6                 | 0.9   | 0.3  | 0.3   | 1.4                 | 1.9   | 1.9   | 1.6   | 2.1      | Neg            |
|                                               | 9               | N/A  | 1.1                 | 1.0   | 0.4  | 0.4   | 2.6                 | 2.9   | 3.9   | 2.0   | 5.0      | Neg            |
|                                               | 11              | N/A  | 0.7                 | 1.1   | 0.4  | 0.4   | 2.0                 | 2.1   | 3.7   | 1.1   | 4.0      | Neg            |
|                                               | 11              | N/A  | 0.7                 | 1.3   | 0.5  | 0.5   | 2.3                 | 2.8   | 3.1   | 1.4   | 2.7      | Neg            |
|                                               | 11              | N/A  | 1.4                 | 2.1   | 0.6  | 0.6   | 3.1                 | 4.7   | 6.0   | 2.8   | 7.2      | HPV16          |
|                                               | 12              | N/A  | 44.8                | 10.2  | 6.1  | 6.4   | 26.4                | 24.5  | 7.6   | 117.0 | 92.3     | Neg            |
|                                               | 12              | N/A  | 1.4                 | 2.0   | 0.5  | 0.5   | 3.4                 | 4.6   | 6.5   | 2.3   | 6.9      | Neg            |
|                                               | 12              | N/A  | 1.5                 | 2.5   | 0.9  | 1.1   | 4.3                 | 5.6   | 5.8   | 4.3   | 5.4      | Neg            |

Note: Only unvaccinated children with at least one HPV positive serological result were included. Vaccination status was based on self-report, but verified by medical records where available. Titers based on either a 4-plex (N=7 children with FA) or 9-plex HPV VLP IgG enzyme-linked immunosorbent assay (ELISA). Most recent time points were used if more than one sample had been collected prioritizing before transplant samples over post-transplant samples. HSCT - hematopoietic stem cell transplant. N/A indicates not applicable. Neg - indicates a negative result. Self-reported sexual activity is a known limitation to the study.
